# Supplementary material for: Old tools, new applications: Use of environmental bacteriophages for typhoid surveillance and evaluating vaccine impact
Source: PubMed Central journal article supplement (PMC10868810; doi:10.1371/journal.pntd.0011822), 2024-02-15
Supplement: pntd.0011822.s002.pdf [file pntd.0011822.s002.pdf]

# PLOS Neglected Tropical Diseases

## Old tools, new applications: use of environmental bacteriophages for typhoid surveillance and evaluating vaccine impact

--Manuscript Draft--

|                                                                                                                                                                                                                                                                                                        |                                                                                                                                                                                                                                                                                                                                                                                                                                                                                                                                                                                                                                                                                                                                                                                                                                                                                                                                                                                                                                                                                                                                                                                                                                                                                                                                                                                                                                                                                                                                                                                                                                                                                                                                                                                                                                                |
|--------------------------------------------------------------------------------------------------------------------------------------------------------------------------------------------------------------------------------------------------------------------------------------------------------|------------------------------------------------------------------------------------------------------------------------------------------------------------------------------------------------------------------------------------------------------------------------------------------------------------------------------------------------------------------------------------------------------------------------------------------------------------------------------------------------------------------------------------------------------------------------------------------------------------------------------------------------------------------------------------------------------------------------------------------------------------------------------------------------------------------------------------------------------------------------------------------------------------------------------------------------------------------------------------------------------------------------------------------------------------------------------------------------------------------------------------------------------------------------------------------------------------------------------------------------------------------------------------------------------------------------------------------------------------------------------------------------------------------------------------------------------------------------------------------------------------------------------------------------------------------------------------------------------------------------------------------------------------------------------------------------------------------------------------------------------------------------------------------------------------------------------------------------|
| <b>Manuscript Number:</b>                                                                                                                                                                                                                                                                              | PNTD-D-23-00752                                                                                                                                                                                                                                                                                                                                                                                                                                                                                                                                                                                                                                                                                                                                                                                                                                                                                                                                                                                                                                                                                                                                                                                                                                                                                                                                                                                                                                                                                                                                                                                                                                                                                                                                                                                                                                |
| <b>Full Title:</b>                                                                                                                                                                                                                                                                                     | Old tools, new applications: use of environmental bacteriophages for typhoid surveillance and evaluating vaccine impact                                                                                                                                                                                                                                                                                                                                                                                                                                                                                                                                                                                                                                                                                                                                                                                                                                                                                                                                                                                                                                                                                                                                                                                                                                                                                                                                                                                                                                                                                                                                                                                                                                                                                                                        |
| <b>Short Title:</b>                                                                                                                                                                                                                                                                                    | Detection of environmental bacteriophages for typhoid fever surveillance                                                                                                                                                                                                                                                                                                                                                                                                                                                                                                                                                                                                                                                                                                                                                                                                                                                                                                                                                                                                                                                                                                                                                                                                                                                                                                                                                                                                                                                                                                                                                                                                                                                                                                                                                                       |
| <b>Article Type:</b>                                                                                                                                                                                                                                                                                   | Research Article                                                                                                                                                                                                                                                                                                                                                                                                                                                                                                                                                                                                                                                                                                                                                                                                                                                                                                                                                                                                                                                                                                                                                                                                                                                                                                                                                                                                                                                                                                                                                                                                                                                                                                                                                                                                                               |
| <b>Keywords:</b>                                                                                                                                                                                                                                                                                       | Salmonella Typhi, Bacteriophages, wastewater surveillance, LMICs                                                                                                                                                                                                                                                                                                                                                                                                                                                                                                                                                                                                                                                                                                                                                                                                                                                                                                                                                                                                                                                                                                                                                                                                                                                                                                                                                                                                                                                                                                                                                                                                                                                                                                                                                                               |
| <b>Abstract:</b>                                                                                                                                                                                                                                                                                       | <p>Typhoid-conjugate vaccines (TCVs) provide an opportunity to reduce the burden of typhoid fever, caused by Salmonella Typhi, in endemic areas. As policymakers design vaccination strategies, accurate and high-resolution data on disease burden is crucial. However, traditional blood culture-based surveillance is resource-extensive, prohibiting its large-scale and sustainable implementation. Salmonella Typhi is a water-borne pathogen, and here, we tested the potential of Typhi-specific bacteriophage surveillance in surface water bodies as a low-cost tool to identify where Salmonella Typhi circulates in the environment. In 2021, water samples were collected and tested for the presence of Salmonella Typhi bacteriophages at two sites in Bangladesh: urban capital city, Dhaka, and a rural district, Mirzapur. Salmonella Typhi-specific bacteriophages were detected in 66 of 211 (31%) environmental samples in Dhaka, in comparison to 3 of 92 (3%) environmental samples from Mirzapur. In the same year, 4,620 blood cultures at the two largest pediatric hospitals of Dhaka yielded 215 (5%) culture-confirmed typhoid cases, and 3,788 blood cultures in the largest hospital of Mirzapur yielded 2 (0.05%) cases. 75% (52/69) of positive phage samples were collected from sewage. All isolated phages were tested against a panel of isolates from different Salmonella Typhi genotypes circulating in Bangladesh and were found to exhibit a diverse killing spectrum, indicating diverse bacteriophages were isolated. These results suggest an association between the presence of Typhi-specific phages in the environment and the burden of typhoid fever, and the potential of utilizing environmental phage surveillance as a low-cost tool to assist policy decisions on typhoid control.</p> |
| <b>Additional Information:</b>                                                                                                                                                                                                                                                                         |                                                                                                                                                                                                                                                                                                                                                                                                                                                                                                                                                                                                                                                                                                                                                                                                                                                                                                                                                                                                                                                                                                                                                                                                                                                                                                                                                                                                                                                                                                                                                                                                                                                                                                                                                                                                                                                |
| <b>Question</b>                                                                                                                                                                                                                                                                                        | <b>Response</b>                                                                                                                                                                                                                                                                                                                                                                                                                                                                                                                                                                                                                                                                                                                                                                                                                                                                                                                                                                                                                                                                                                                                                                                                                                                                                                                                                                                                                                                                                                                                                                                                                                                                                                                                                                                                                                |
| <b>Government Employee</b>                                                                                                                                                                                                                                                                             | No - No authors are employees of the U.S. government.                                                                                                                                                                                                                                                                                                                                                                                                                                                                                                                                                                                                                                                                                                                                                                                                                                                                                                                                                                                                                                                                                                                                                                                                                                                                                                                                                                                                                                                                                                                                                                                                                                                                                                                                                                                          |
| Are you or any of the contributing authors an employee of the United States government?                                                                                                                                                                                                                |                                                                                                                                                                                                                                                                                                                                                                                                                                                                                                                                                                                                                                                                                                                                                                                                                                                                                                                                                                                                                                                                                                                                                                                                                                                                                                                                                                                                                                                                                                                                                                                                                                                                                                                                                                                                                                                |
| Manuscripts authored by one or more US Government employees are not copyrighted, but are licensed under a <a href="#">CC0 Public Domain Dedication</a> , which allows unlimited distribution and reuse of the article for any lawful purpose. This is a legal requirement for US Government employees. |                                                                                                                                                                                                                                                                                                                                                                                                                                                                                                                                                                                                                                                                                                                                                                                                                                                                                                                                                                                                                                                                                                                                                                                                                                                                                                                                                                                                                                                                                                                                                                                                                                                                                                                                                                                                                                                |

|                                                                                                                                                                                                                                                                                                                                                                                                                                                                                                                                                                                                                                                                                                                                                                                                                                                                                                                                                                                                                                                              |                                                                                                                                                                                          |
|--------------------------------------------------------------------------------------------------------------------------------------------------------------------------------------------------------------------------------------------------------------------------------------------------------------------------------------------------------------------------------------------------------------------------------------------------------------------------------------------------------------------------------------------------------------------------------------------------------------------------------------------------------------------------------------------------------------------------------------------------------------------------------------------------------------------------------------------------------------------------------------------------------------------------------------------------------------------------------------------------------------------------------------------------------------|------------------------------------------------------------------------------------------------------------------------------------------------------------------------------------------|
| <p>This will be typeset if the manuscript is accepted for publication.</p>                                                                                                                                                                                                                                                                                                                                                                                                                                                                                                                                                                                                                                                                                                                                                                                                                                                                                                                                                                                   |                                                                                                                                                                                          |
| <p><b>Financial Disclosure</b></p> <p>Enter a financial disclosure statement that describes the sources of funding for the work included in this submission. Review the <a href="#">submission guidelines</a> for detailed requirements. View published research articles from <a href="#">PLOS Neglected Tropical Diseases</a> for specific examples.</p> <p>This statement is required for submission and <b>will appear in the published article</b> if the submission is accepted. Please make sure it is accurate.</p> <p><b>Funded studies</b></p> <p>Enter a statement with the following details:</p> <ul style="list-style-type: none"> <li>• Initials of the authors who received each award</li> <li>• Grant numbers awarded to each author</li> <li>• The full name of each funder</li> <li>• URL of each funder website</li> <li>• Did the sponsors or funders play any role in the study design, data collection and analysis, decision to publish, or preparation of the manuscript?</li> </ul> <p>Did you receive funding for this work?</p> | <p>Yes</p>                                                                                                                                                                               |
| <p>Please add funding details as follow-up to "<b>Financial Disclosure</b></p> <p>Enter a financial disclosure statement that describes the sources of funding for the work included in this submission. Review the <a href="#">submission guidelines</a> for detailed requirements. View published research articles from <a href="#">PLOS Neglected Tropical Diseases</a> for specific examples.</p> <p>This statement is required for submission and <b>will appear in the published article</b> if the submission is accepted. Please make sure it is accurate.</p>                                                                                                                                                                                                                                                                                                                                                                                                                                                                                      | <p>The present study was the funded by a grant from the Bill and Melinda Gates Foundation (INV003717). The funding agency had no role in the design and implementation of the study.</p> |

|                                                                                                                                                                                                                                                                                                                                                                                                                                                                                                                                                                                                                                                                                                                                                                                                                                                                                                                                                                                                                                                                                                                                                                                                                          |                                                                                              |
|--------------------------------------------------------------------------------------------------------------------------------------------------------------------------------------------------------------------------------------------------------------------------------------------------------------------------------------------------------------------------------------------------------------------------------------------------------------------------------------------------------------------------------------------------------------------------------------------------------------------------------------------------------------------------------------------------------------------------------------------------------------------------------------------------------------------------------------------------------------------------------------------------------------------------------------------------------------------------------------------------------------------------------------------------------------------------------------------------------------------------------------------------------------------------------------------------------------------------|----------------------------------------------------------------------------------------------|
| <p><b>Funded studies</b></p> <p>Enter a statement with the following details:</p> <ul style="list-style-type: none"> <li>• Initials of the authors who received each award</li> <li>• Grant numbers awarded to each author</li> <li>• The full name of each funder</li> <li>• URL of each funder website</li> <li>• Did the sponsors or funders play any role in the study design, data collection and analysis, decision to publish, or preparation of the manuscript?</li> </ul> <p>Did you receive funding for this work?"</p>                                                                                                                                                                                                                                                                                                                                                                                                                                                                                                                                                                                                                                                                                        |                                                                                              |
| <p>Please select the country of your main research funder (please select carefully as in some cases this is used in fee calculation).</p> <p>as follow-up to "<b>Financial Disclosure</b></p> <p>Enter a financial disclosure statement that describes the sources of funding for the work included in this submission. Review the <a href="#">submission guidelines</a> for detailed requirements. View published research articles from <a href="#">PLOS Neglected Tropical Diseases</a> for specific examples.</p> <p>This statement is required for submission and <b>will appear in the published article</b> if the submission is accepted. Please make sure it is accurate.</p> <p><b>Funded studies</b></p> <p>Enter a statement with the following details:</p> <ul style="list-style-type: none"> <li>• Initials of the authors who received each award</li> <li>• Grant numbers awarded to each author</li> <li>• The full name of each funder</li> <li>• URL of each funder website</li> <li>• Did the sponsors or funders play any role in the study design, data collection and analysis, decision to publish, or preparation of the manuscript?</li> </ul> <p>Did you receive funding for this work?"</p> | <p>UNITED STATES - US</p>                                                                    |
| <p><b>Competing Interests</b></p>                                                                                                                                                                                                                                                                                                                                                                                                                                                                                                                                                                                                                                                                                                                                                                                                                                                                                                                                                                                                                                                                                                                                                                                        | <p>The authors declare that they have no known competing financial interests or personal</p> |

|                                                                                                                                                                                                                                                                                                                                                                                                                                                                                                                                                                                                                |                                                                                                                                                                           |
|----------------------------------------------------------------------------------------------------------------------------------------------------------------------------------------------------------------------------------------------------------------------------------------------------------------------------------------------------------------------------------------------------------------------------------------------------------------------------------------------------------------------------------------------------------------------------------------------------------------|---------------------------------------------------------------------------------------------------------------------------------------------------------------------------|
| <p>On behalf of all authors, disclose any competing interests that could be perceived to bias this work.</p> <p>This statement will be typeset if the manuscript is accepted for publication.</p> <p>Review the instructions link below and PLOS NTDs' <a href="#">competing interests</a> policy to determine what information must be disclosed at submission.</p>                                                                                                                                                                                                                                           | <p>relationships that could have appeared to influence the work reported in this paper.</p>                                                                               |
| <p><b>Data Availability</b></p> <p>Provide a <b>Data Availability Statement</b> in the box below. This statement should detail where the data used in this submission can be accessed. This statement will be typeset if the manuscript is accepted for publication.</p> <p>Before publication, authors are required to make all data underlying their findings fully available, without restriction. Review our <a href="#">PLOS Data Policy</a> page for detailed information on this policy. Instructions for writing your Data Availability statement can be accessed via the Instructions link below.</p> | <p>All data is available upon personal communication with the corresponding author Dr. Senjuti Saha, <a href="mailto:senjutisaha@chrfd.org">senjutisaha@chrfd.org</a></p> |

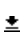

1        **Old tools, new applications: use of environmental bacteriophages for typhoid surveillance**  
2                **and evaluating vaccine impact**

3

4 Short title: Detection of environmental bacteriophages for typhoid fever surveillance

5

6 Yogesh Hooda<sup>1</sup>, Shuborno Islam<sup>1</sup>, Rathin Kabiraj<sup>1</sup>, Hafizur Rahman<sup>1</sup>, Kesia E. da Silva<sup>2</sup>, Rajan

7 Saha Raju<sup>1</sup>, Stephen P Luby<sup>2</sup>, Jason R Andrews<sup>2</sup>, Samir K Saha<sup>1,3</sup>, Senjuti Saha<sup>1\*#</sup>

8

9 <sup>1</sup> Child Health Research Foundation, Dhaka, Bangladesh.

10 <sup>2</sup> Division of Infectious Diseases and Geographic Medicine, Stanford University School of  
11 Medicine, Stanford, California, USA.

12 <sup>3</sup> Department of Microbiology, Bangladesh Shishu Hospital and Institute, Dhaka, Bangladesh.

13

14

15 #Correspondence to

16 Senjuti Saha

17 Director & Scientist

18 Child Health Research Foundation

19 Dhaka, Bangladesh

20 [senjutisaha@chrfd.org](mailto:senjutisaha@chrfd.org)

21 **ABSTRACT**

22 Typhoid-conjugate vaccines (TCVs) provide an opportunity to reduce the burden of typhoid  
23 fever, caused by *Salmonella* Typhi, in endemic areas. As policymakers design vaccination  
24 strategies, accurate and high-resolution data on disease burden is crucial. However, traditional  
25 blood culture-based surveillance is resource-extensive, prohibiting its large-scale and  
26 sustainable implementation. *Salmonella* Typhi is a water-borne pathogen, and here, we tested  
27 the potential of Typhi-specific bacteriophage surveillance in surface water bodies as a low-cost  
28 tool to identify where *Salmonella* Typhi circulates in the environment. In 2021, water samples  
29 were collected and tested for the presence of *Salmonella* Typhi bacteriophages at two sites in  
30 Bangladesh: urban capital city, Dhaka, and a rural district, Mirzapur. *Salmonella* Typhi-specific  
31 bacteriophages were detected in 66 of 211 (31%) environmental samples in Dhaka, in  
32 comparison to 3 of 92 (3%) environmental samples from Mirzapur. In the same year, 4,620  
33 blood cultures at the two largest pediatric hospitals of Dhaka yielded 215 (5%) culture-  
34 confirmed typhoid cases, and 3,788 blood cultures in the largest hospital of Mirzapur yielded 2  
35 (0.05%) cases. 75% (52/69) of positive phage samples were collected from sewage. All isolated  
36 phages were tested against a panel of isolates from different *Salmonella* Typhi genotypes  
37 circulating in Bangladesh and were found to exhibit a diverse killing spectrum, indicating  
38 diverse bacteriophages were isolated. These results suggest an association between the  
39 presence of Typhi-specific phages in the environment and the burden of typhoid fever, and the  
40 potential of utilizing environmental phage surveillance as a low-cost tool to assist policy  
41 decisions on typhoid control.

42

43 **Author summary**

44 The WHO prequalified two typhoid conjugate vaccines for use to reduce the burden of typhoid  
45 fever. As policymakers design vaccination strategies, accurate, high-resolution estimates of  
46 typhoid burden are crucial for efficient use of the vaccines. Typhoid burden can vary widely; for  
47 example, in Bangladesh, burden is high in the urban capital city Dhaka, but is 10-fold lower in  
48 the rural site, Mirzapur. Optimal local data rely on traditional blood-culture-based surveillance,  
49 which is expensive and often unavailable. With the knowledge that *Salmonella* Typhi, cause of  
50 typhoid fever, is a water-borne pathogen, we tested an environmental surveillance tool that  
51 detects bacteriophages (viruses) against *Salmonella* Typhi in environmental water bodies using  
52 simple assays. Testing of 303 water samples from Dhaka and Mirzapur showed a 10-fold lower  
53 abundance of bacteriophages in Mirzapur, depicting a correlation with typhoid burden in the  
54 community. This low-cost surveillance can be employed in different regions to generate rapid  
55 data on typhoid burden for evidence-based introduction of vaccines and tracking their impact  
56 upon rollout.

57 **INTRODUCTION**

58 Typhoid fever is a systemic infection caused by the water-borne pathogen *Salmonella enterica*  
59 serovar Typhi. This pathogen is common in many low- and middle-income countries (LMICs)  
60 causing an estimated 135 000 deaths and 14 million infections globally [1]. The World Health  
61 Organization (WHO) recommended the use of typhoid conjugate vaccines in settings with high  
62 burden of typhoid fever [2,3]. Countries have begun implementing these suggestions, and  
63 several countries have performed large-scale clinical trials to demonstrate that these vaccines  
64 exhibit 80-85% efficacy in preventing infections [4–6]. Typhoid-conjugate vaccines are currently  
65 being utilize to tackle an extensively-drug resistant (XDR) *Salmonella* Typhi outbreak in  
66 Hyderabad, Pakistan, where vaccine effectiveness has been demonstrated to be high [7].

67  
68 Decisions are currently being made to roll out typhoid-conjugate vaccines in other endemic  
69 countries, however, accurate and high-resolution spatial data regarding the burden of typhoid  
70 is required for optimal use of the available vaccines. The current estimates of burden of typhoid  
71 fever in countries have primarily come from modelling studies based on limited surveillance  
72 data and do not provide the geographical and temporal resolution within local communities  
73 and countries to design effective preventive and treatment measures. The paucity of the data is  
74 in large part because traditional blood culture surveillance is resource extensive, requires  
75 clinical laboratory infrastructure and trained health and research professionals. Consequently,  
76 very few LMICs routinely conduct these studies and a few that do, tend to focus on high-risk  
77 urban settings, and are not able to sustain these studies as a regular part of health  
78 infrastructure. This has led to search for low-cost and sustainable methods to supplement



79 traditional clinical surveillance systems [8,9]. To this end, environmental surveillance strategies  
80 that can identify *Salmonella* Typhi in different water supply have been proposed. In recent  
81 years, environmental wastewater surveillance has been used for early detection and  
82 monitoring the spread of SARS-CoV-2 [10,11] and poliovirus [12] among others.

83  
84 Previous studies have shown that high detectable levels of *Salmonella* Typhi in the water supply  
85 overlaps with areas of disease burden, suggesting sampling water could be utilized as a  
86 preliminary surveillance proxy [8,13]. While it has not been possible to reproducibly culture  
87 *Salmonella* Typhi directly from environmental water, quantitative polymerase chain reaction  
88 (qPCR) has been proposed to detect *Salmonella* Typhi DNA [9,14]. However, qPCR-based  
89 methods cannot be replicated in most settings with typhoid burden, due to the lack of  
90 infrastructure (machines, molecular techniques etc.) and the high associated cost. To address

91 this gap, we investigated if the presence of bacteriophages in the environmental water samples  
92 could be used as a proxy to estimate the prevalence of *Salmonella* Typhi in water bodies. 

93  
94 Bacteriophages (or phages) are viruses that infect bacteria and bacterial abundance, phenotypic

95 characteristics, and long-term evolutionary trajectory.  Bacteriophages are very specific to their  
96 host bacterial species and often able to discriminate between different sub-populations based  
97 on minor genetic differences in host receptor and surface epitopes [15]. Bacteriophages against  
98 *Salmonella* Typhi (Typhi phages) were first reported in the 1940's [16]. Typhi phages were  
99 extensively used for bacterial typing in the 1940s-80s before the advent of molecular diagnostic  
100 methods such as PCR and genomic sequencing [17].  However, little has been in done in the last

101 50 years and there is a lack of contemporary literature regarding Typhi phages from typhoid-  
102 endemic countries. This motivated us to initiate a pilot study to determine the feasibility of  
103 detecting *Salmonella* Typhi-specific phages in water bodies and typhoid burden at two  
104 geographic regions: Dhaka, a city of 9 million people with a high typhoid burden and Mirzapur,  
105 a rural district with 340,000 people that has low typhoid burden. Overall, our work provides a  
106 pilot study for testing if the prevalence of phages correlates with local typhoid burden.

107

## 108 **METHODS**

### 109 Data from clinical surveillance and ethical considerations

110 The clinical laboratories of Bangladesh Shishu Hospital and Institute [BSHI], Shishu Shasthya  
111 Foundation Hospital, [SSFH]) and Kumudini Women Medical College and Hospital [KMWCH] are  
112 part of the laboratory network of Child Health Research Foundation CHRF, where all data are  
113 stored electronically. These laboratories are part of the WHO-supported Invasive Bacterial  
114 Vaccine Preventable Surveillance conducted at the CHRF and has been described earlier [18].  
115 Data on blood culture surveillance was obtained from these electronic records. The protocols  
116 for data use were approved by the ethics review committees of the Bangladesh Institute of  
117 Child Health, BSHI. Blood samples were collected and received at the laboratories as part of  
118 routine clinical care.

119

### 120 Environmental sample collection and bacteriophage isolation

121 Water samples were collected from sewage drains, rivers, ponds, lakes, and stagnant water  
122 bodies selected based on accessibility. Stagnant waters are defined as temporary water bodies

123 that form after flooding or rainfall that cannot be used for livestock or human use, often due to  
124 poor water quality. A sterile cup, attached to a rope, was used to collect >10 ml of water  
125 sample from each source. Maintaining sterile techniques, the sample was transferred into a  
126 sterile bottle for transportation. Ten ml of the sample was centrifuged at 1,000 rpm for 5  
127 minutes in a 15 mL conical tube to pellet large soil debris. The supernatant was passed through  
128 a 0.22 µm PES syringe filter into a new tube. The filtered sample was stored at 4°C up to 72  
129 hours before use for further experiments.

130

131 A total of 500 µL of the filtered water sample was mixed with 450 µl of LB broth and 50 µl of  
132 overnight liquid Ty2 host culture in a 2 mL microcentrifuge tube. This mixture was incubated at  
133 37°C for 2 hours followed by the addition of 2-3 drops of chloroform to lyse and kill all bacteria  
134 in the mixture without affecting bacteriophages. The mixture was then centrifuged at 10,000  
135 rpm for 10 minutes and 750 µL of the supernatant potentially containing enriched *Salmonella*  
136 Typhi bacteriophages was transferred to a new tube. 

137

### 138 *Bacteriophage detection & propagation*

139 For bacteriophage detection, the enriched sample was tested using the double-layer agar  
140 method described earlier [19]. In brief, 100 µl of the sample was incubated with 200 µl of  
141 overnight culture host strain Ty2 for 20 minutes. The entire 300 µl and was mixed with 4 mL of  
142 molten soft agar (0.7% agar) and poured over solid hard agar plates (1.5% agar). These plates  
143 were incubated at 37°C for 14-16 hours and the appearance of plaques the next day indicated  
144 the presence of bacteriophages in the sample. For each plaque morphology, a plaque was

145 picked using a 100 µl pipette tip and resuspended in 100 µl of tryptic soy broth. Two drops of  
146 chloroform were added to the resuspension followed by 10 minutes of incubation, and a final  
147 centrifugation at 10,000 rpm for 10 minutes. 70 µl of the supernatant was transferred to a new  
148 tube which contained a clone of phages of a single morphology. 

149

### 150 Activity spectra of Typhi phages

151 To confirm that these phages are Typhi specific, 2 µl dilutions of isolated phages were spotted  
152 on strains of *Salmonella* enteric serovars Paratyphi A (E321: 1100582310), Paratyphi B (366817)  
153 and Typhimurium LT2, and Gram-negative bacteria *Escherichia coli* (ATCC: 25922), *Klebsiella*  
154 *pneumoniae* (ATCC: 700603 & ATCC: 9349) and *Pseudomonas aeruginosa* (ATCC: 27853) using  
155 the double layer methodology.

156

157 To test diversity of the phages, they were also spotted on 14 *Salmonella* Typhi isolates collected  
158 from blood culture belonging to different genotypes previously described to be present in  
159 Bangladesh [20]. The plates were incubated overnight at 37°C for 14-16 hours and the plates  
160 visualized for zones of clearing. The killing activities against the different genotypes were  
161 recorded and hierarchical clustering and heat map generation was made using the R package  
162 *heatmaply*.

163

## 164 **Results**

### 165 Clinical typhoid surveillance

166 Since 2012, we have been conducting surveillance to monitor enteric fever, pneumonia,  
 167 meningitis, and sepsis (as part of the Invasive Bacterial Vaccine Preventable Disease  
 168 Surveillance of the WHO) in two hospitals in urban Dhaka (BSHI and SSFH), and in one hospital  
 169 in Mirzapur (KMWCH), a rural district approximately 60 km north of Dhaka [18,21]. In 2021, we  
 170 performed 4,620 blood cultures in BSHI & SSFH, of which 215 (4.7%) were culture-confirmed for  
 171 *Salmonella* Typhi. In contrast, at KMWCH, during the same period 3,788 blood cultures were  
 172 performed and only 2 (0.05%) were culture-confirmed for *Salmonella* Typhi (Table 1). The  
 173 burden of culture-confirmed cases of typhoid fever in Mirzapur **in** 100-fold lower.  
 174

**Table 1. Blood culture positivity of *Salmonella* Typhi in clinical surveillance, and bacteriophage positivity in environmental water samples in Dhaka and Mirzapur, Bangladesh.**

| Study site in Bangladesh | Type of surveillance       | Type of sample | Total no. of samples tested | No. of <i>Salmonella</i> Typhi/ phage positive sample | % Positive samples |
|--------------------------|----------------------------|----------------|-----------------------------|-------------------------------------------------------|--------------------|
| Dhaka                    | Clinical surveillance      | Blood          | 4620                        | 215                                                   | 5%                 |
|                          | Environmental surveillance | Sewage         | 168                         | 51                                                    | 30%                |
|                          |                            | Lake           | 18                          | 10                                                    | 56%                |
|                          |                            | Pond           | 15                          | 2                                                     | 13%                |
|                          |                            | River          | 5                           | 2                                                     | 40%                |
|                          |                            | Stagnant water | 5                           | 1                                                     | 20%                |
|                          |                            | Total          | 211                         | 66                                                    | 31%                |
| Mirzapur                 | Clinical surveillance      | Blood          | 3788                        | 2                                                     | 0.05%              |
|                          | Environmental surveillance | Sewage         | 3                           | 1                                                     | 33%                |
|                          |                            | Pond           | 48                          | 0                                                     | 0%                 |
|                          |                            | River          | 4                           | 0                                                     | 0%                 |
|                          |                            | Stagnant water | 37                          | 2                                                     | 5%                 |
|                          |                            | Total          | 92                          | 3                                                     | 3%                 |

175 Environmental phage surveillance

176 Between August 2021 and December 2021, we collected 211 environmental water samples in  
177 the Dhaka region. These samples constituted of sewage water (n = 168), lake (n = 18), pond (n =  
178 15), river (n = 5) and stagnant water (n = 5) from different sites across Dhaka (Figure 1A). Sixty-  
179 six of the 211 samples (31%) exhibited plaque formation, and in all cases, the plaques could be  
180 propagated confirming the presence of active bacteriophages. We observed at least two  
181 morphologies in 16 samples suggesting different phages in the same sample. Phages of  
182 different morphologies could be further purified during propagation bringing the total number  
183 isolated lytic phages to 82 from 211 samples in Dhaka. The distribution of positive and negative  
184 samples showed that Typhi phages were present in all types of water bodies tested (Table 1).

185

186 In contrast, a total of 92 environmental samples were collected during the same time from the  
187 Mirzapur region (Figure 1B). These samples constituted of sewage water (n = 3), pond (n = 48),  
188 river (n = 4), and stagnant water (n = 37). A total of 3 samples showed positive phage lytic  
189 activity in the 92 samples tested (3%), the details of which are provided in Table 1. Two  
190 different plaque morphologies were noted in one sample, bringing a total of 4 isolated phages  
191 from these 92 samples (Table 1). No phages were detected in ponds or river; one positive  
192 sample was from sewage water (n=1, 33%) and two from stagnant water. Overall, phage  
193 prevalence in water bodies in Dhaka (31%) was 10-fold higher than water bodies in Mirzapur  
194 (3%), correlating with the culture-confirmed typhoid cases in the largest hospitals of the  
195 regions.

196

197 Host range and diversity of Typhi phages

198 To test the specificity of phages isolated, we tested all 86 isolated phages against closely related  
199 *Salmonella* enteric serovars Typhimurium, Paratyphi A and Paratyphi B, and closely related  
200 *Enterobacteriaceae* species *Escherichia coli* and *Klebsiella pneumoniae*. Another gamma-  
201 proteobacterium *Pseudomonas aeruginosa* was also included. No cross activity was observed,  
202 depicting that these phages are highly specific to *Salmonella* Typhi.

203

204 Furthermore, to understand the diversity of the phages collected, we tested the killing  
205 spectrum of the 86 phages against a panel of 14 *Salmonella* Typhi strains each representing a  
206 different genotype circulating in Bangladesh [20] (Figure 2). The phages showed a diverse killing  
207 spectrum and could be grouped into 48 clusters based on their killing activity. This  
208 demonstrated that the circulating *Salmonella* Typhi strains in Bangladesh are not equally  
209 susceptible to all environmental phages; some are more susceptible than others. In addition,  
210 phages with different plaque morphologies from the same samples often displayed (for  
211 example DK\_23.1 and DK\_23.2) different spectra, indicating that multiple phages can circulate  
212 in the same water body at the same time.

213

214 **Discussion**

215 Our pilot study shows that detection of bacteriophages specific to *Salmonella* Typhi may be a  
216 rapid environmental surveillance method to understand the presence of typhoid fever in the  
217 community. 33% of environmental samples collected in Dhaka contained phages, where blood

218 culture positivity was 5%; by comparison, 3% of environmental samples collected in Mirzapur  
219 contained phages, where blood culture positivity was 0.05%. Of all the sources of water  
220 collected, 52/69 (75%) of samples were collected from sewage indicating that wastewater  
221 surveillance is well-suited for monitoring typhoid fever. In Dhaka, a city with high burden of  
222 typhoid fever, high phage positivity was also seen in water samples collected from lakes (56%)  
223 and rivers (40%). Similar results were obtained from the related study from Nepal, another  
224 typhoid endemic country in South Asia.

225  
226 Given the minimal resources required for undertaking environmental phage surveillance, it can  
227 be readily rolled out in resource-constrained settings and can complement existing surveillance  
228 strategies. Sample processing required minimal resources, which primarily include collection  
229 bottles and/or tubes, syringes with 0.22 syringe filters, petri dishes, media for bacterial growth,  
230 an incubator, a centrifuge, pipettes, and the laboratory strain Ty2 of *Salmonella* Typhi (See  
231 Methods). The cost for consumables for each sample less than USD 10 in Bangladesh, this might  
232 vary slightly based on location. Such low costs of sample collection and easy processing means  
233 that phage surveillance is more scalable than PCR-based molecular methods, which are both  
234 resource and expertise intensive. Furthermore, the stability of phages [22] in water means that  
235 samples can be collected from all over the country and tested at any location with minimal  
236 fears of loss of quality of the results obtained. In contrast, environmental DNA degrades fast,  
237 and thus PCR based surveillance typically requires transport of refrigerated or frozen samples.  
238



239 Limited work has been done in investigating the role that phages play in the ecology of  
240 *Salmonella* Typhi. The abundance and diversity of Typhi phages in terms of the killing spectrum  
241 (seen in our study) and the genetic sequences (seen in related study from Nepal) highlight that  
242 Typhi bacteriophages are likely to play an important role in determining the spread and  
243 seasonality of *Salmonella* Typhi. Additionally, certain genotypes of *Salmonella* Typhi (such as  
244 1.2.1, 2.2 and 4.3.1.1) are more resistant to phages vs others (such as 4.3.1.2, 4.3.1 and 2.5).  
245 The molecular basis of the observed differences in phage resistance amongst different  
246 genotypes may be due to differences in receptor sequences and/or modifications, or presence  
247 of phage defense systems (such as CRISPR-Cas). Future studies addressing these questions may  
248 be helpful in determining the impact phages have on circulating *Salmonella* Typhi population  
249 (Faruque et al., 2005; LeGault et al., 2021). Additionally, with rising antimicrobial drug  
250 resistance, renewed research on Typhi phages might provide alternate weapons for clinical  
251 development.

252

253 The results in this study should be interpreted within the context of the following limitations.  
254 First, the number of samples obtained does not fully represent the number of water bodies  
255 present in Dhaka or Mirzapur. Second, no water sampling could be conducted from July-August  
256 during the study period due to monsoon-associated floods. Third, all phage amplification steps  
257 were done in *Salmonella* Typhi strain Ty2, and hence phages that do not infect this strain were  
258 missed. Fourth, sewage samples were underrepresented in Mirzapur due to lack of a sewage  
259 system in many parts of rural areas. Finally, comparison with the PCR-based assays will be  
260 required to identify the specificity and sensitivity of phage detection. Expansion of this study to

261 other regions of Bangladesh where clinical data is available will help in resolving some of these  
262 limitations. It would also be helpful to examine temporal trends in phage positivity and how  
263 these trends correlate with the seasonality of typhoid fever.

264

265 In summary, in this study, we propose a simple, cost-effective, and scalable method for  
266 conducting environmental surveillance for typhoid fever. The method uses standard  
267 microbiological laboratory infrastructure and techniques to detect Typhi-specific  
268 bacteriophages. Environmental phage surveillance can be used to estimate typhoid in other  
269 countries, including in Sub-Saharan Africa where limited epidemiological data on typhoid fever  
270 is available [25,26]. Environmental phage surveillance may be also applied to map routes of  
271 disease transmission by focusing on wastewater/sewage facilities in the region. This tool,  
272 combined with traditional blood culture surveillance [27], can generate community-level data  
273 to evaluate the impact of interventions including the introduction of TCV, water improvement  
274 projects, and sanitation and hygiene systems.

275

## 276 **Funding**

277 The present study was the funded by a grant from the Bill and Melinda Gates Foundation  
278 (INV003717). The funding agency had no role in the design and implementation of the study.

279

## 280 **CRedit authorship contribution statement**

281 **Y. Hooda:** Conceptualization, Methodology, Formal analysis, Investigation, Visualization,  
282 Writing – original draft, Writing – review & editing. **S. Islam:** Methodology, Writing – original

283 draft, Formal analysis, Data curation, Visualization. **R. Kabiraj:** Methodology, Formal analysis,  
284 Data curation, Visualization. **KE daSilva:** Resources, Writing – review & editing. **R.S. Raju:**  
285 Formal analysis, Visualization. **S.P. Luby:** Writing – review & editing, Funding acquisition. **J.S.**  
286 **Andrew:** Conceptualization, Methodology, Writing – review & editing. **S.K. Saha:** Supervision,  
287 Funding acquisition, Resources, Writing – review & editing. **S. Saha:** Conceptualization,  
288 Methodology, Formal analysis, Funding acquisition, Resources, Visualization, Writing – original  
289 draft; Writing – review & editing.

290

291

292 **Declaration of competing interest**

293 The authors declare that they have no known competing financial interests or personal  
294 relationships that could have appeared to influence the work reported in this paper.

295

296 **References**

- 297 1. Stanaway JD, Parisi A, Sarkar K, Blacker BF, Reiner RC, Hay SI, et al. The global burden of  
298 non-typhoidal salmonella invasive disease: a systematic analysis for the Global Burden of  
299 Disease Study 2017. *Lancet Infect Dis.* 2019;19: 1312–1324. doi:10.1016/S1473-  
300 3099(19)30418-9
- 301 2. Andrews JR, Qamar FN, Charles RS, Ryan ET. Extensively Drug-Resistant Typhoid — Are  
302 Conjugate Vaccines Arriving Just in Time? *N Engl J Med.* 2018;379: 1493–1495.
- 303 3. Saha SK, Tabassum N, Saha S. Typhoid Conjugate Vaccine: An Urgent Tool to Combat  
304 Typhoid and Tackle Antimicrobial Resistance. *J Infect Dis.* 2021;224: S788–S791.  
305 doi:10.1093/infdis/jiab443
- 306 4. Shakya M, Colin-Jones R, Theiss-Nyland K, Voysey M, Pant D, Smith N, et al. Phase 3  
307 Efficacy Analysis of a Typhoid Conjugate Vaccine Trial in Nepal. *N Engl J Med.* 2019;381:  
308 2209–2218. doi:10.1056/NEJMoa1905047
- 309 5. Qadri F, Khanam F, Liu X, Theiss-Nyland K, Biswas PK, Bhuiyan AI, et al. Protection by  
310 vaccination of children against typhoid fever with a Vi-tetanus toxoid conjugate vaccine in  
311 urban Bangladesh: a cluster-randomised trial. *The Lancet.* 2021;398: 675–684.  
312 doi:10.1016/S0140-6736(21)01124-7
- 313 6. Patel PD, Patel P, Liang Y, Meiring JE, Misiri T, Mwakiseghile F, et al. Safety and Efficacy of  
314 a Typhoid Conjugate Vaccine in Malawian Children. *N Engl J Med.* 2021;385: 1104–1115.  
315 doi:10.1056/NEJMoa2035916

- 316 7. Batool R, Tahir Yousafzai M, Qureshi S, Ali M, Sadaf T, Mehmood J, et al. Effectiveness of  
317 typhoid conjugate vaccine against culture-confirmed typhoid in a peri-urban setting in  
318 Karachi: A case-control study. *Vaccine*. 2021;39: 5858–5865.  
319 doi:10.1016/j.vaccine.2021.08.051
- 320 8. Andrews JR, Yu AT, Saha S, Shakya J, Aiemjoy K, Horng L, et al. Environmental Surveillance  
321 as a Tool for Identifying High-risk Settings for Typhoid Transmission. *Clin Infect Dis Off Publ*  
322 *Infect Dis Soc Am*. 2020;71: S71–S78. doi:10.1093/cid/ciaa513
- 323 9. Saha S, Tanmoy AM, Andrews JR, Sajib MSI, Yu AT, Baker S, et al. Evaluating PCR-Based  
324 Detection of *Salmonella* Typhi and Paratyphi A in the Environment as an Enteric Fever  
325 Surveillance Tool. *Am J Trop Med Hyg*. 2019;100: 43–46. doi:10.4269/ajtmh.18-0428
- 326 10. Karthikeyan S, Levy JI, De Hoff P, Humphrey G, Birmingham A, Jepsen K, et al. Wastewater  
327 sequencing reveals early cryptic SARS-CoV-2 variant transmission. *Nature*. 2022;609: 101–  
328 108. doi:10.1038/s41586-022-05049-6
- 329 11. Karthikeyan S, Ronquillo N, Belda-Ferre P, Alvarado D, Javidi T, Longhurst CA, et al. High-  
330 Throughput Wastewater SARS-CoV-2 Detection Enables Forecasting of Community  
331 Infection Dynamics in San Diego County. *mSystems*. 2021;6: e00045-21.  
332 doi:10.1128/mSystems.00045-21
- 333 12. Asghar H, Diop OM, Weldegebriel G, Malik F, Shetty S, El Bassioni L, et al. Environmental  
334 Surveillance for Polioviruses in the Global Polio Eradication Initiative. *J Infect Dis*.  
335 2014;210: S294–S303. doi:10.1093/infdis/jiu384

- 336 13. Sikorski MJ, Levine MM. Reviving the “Moore Swab”: a Classic Environmental Surveillance  
337 Tool Involving Filtration of Flowing Surface Water and Sewage Water To Recover  
338 Typhoidal Salmonella Bacteria. *Appl Environ Microbiol.* 2020;86: e00060-20.  
339 doi:10.1128/AEM.00060-20
- 340 14. Liu P, Ibaraki M, Kapoor R, Amin N, Das A, Miah R, et al. Development of Moore Swab and  
341 Ultrafiltration Concentration and Detection Methods for Salmonella Typhi and Salmonella  
342 Paratyphi A in Wastewater and Application in Kolkata, India and Dhaka, Bangladesh. *Front*  
343 *Microbiol.* 2021;12: 684094. doi:10.3389/fmicb.2021.684094
- 344 15. De Smet J, Hendrix H, Blasdel BG, Danis-Wlodarczyk K, Lavigne R. Pseudomonas predators:  
345 understanding and exploiting phage–host interactions. *Nat Rev Microbiol.* 2017;15: 517–  
346 530. doi:10.1038/nrmicro.2017.61
- 347 16. Felix A. World survey of typhoid and paratyphoid-B phage types. *Bull World Health Organ.*  
348 1955;13: 109–170.
- 349 17. Farmer JJ, Hickman FW, Sikes JV. Automation of Salmonella typhi phage typing. *Lancet*  
350 *Lond Engl.* 1975;2: 787–790. doi:10.1016/s0140-6736(75)80004-3
- 351 18. Saha S, Islam M, Uddin MJ, Saha S, Das RC, Baqui AH, et al. Integration of enteric fever  
352 surveillance into the WHO-coordinated Invasive Bacterial-Vaccine Preventable Diseases  
353 (IB-VPD) platform: A low cost approach to track an increasingly important disease. *PLoS*  
354 *Negl Trop Dis.* 2017;11: e0005999. doi:10.1371/journal.pntd.0005999

- 355 19. Kropinski AM, Mazzocco A, Waddell TE, Lingohr E, Johnson RP. Enumeration of  
356 Bacteriophages by Double Agar Overlay Plaque Assay. In: Clokie MRJ, Kropinski AM,  
357 editors. Bacteriophages: Methods and Protocols, Volume 1: Isolation, Characterization,  
358 and Interactions. Totowa, NJ: Humana Press; 2009. pp. 69–76. doi:10.1007/978-1-60327-  
359 164-6\_7
- 360 20. Tanmoy AM, Westeel E, Bruyne KD, Goris J, Rajoharison A, Sajib MSI, et al. Salmonella  
361 enterica Serovar Typhi in Bangladesh: Exploration of Genomic Diversity and Antimicrobial  
362 Resistance. *mBio*. 2018;9: e02112-18. doi:10.1128/mBio.02112-18
- 363 21. Saha S, Islam M, Saha S, Uddin MJ, Rahman H, Das RC, et al. Designing Comprehensive  
364 Public Health Surveillance for Enteric Fever in Endemic Countries: Importance of Including  
365 Different Healthcare Facilities. *J Infect Dis*. 2018;218: S227–S231. doi:10.1093/infdis/jiy191
- 366 22. Jończyk E, Kłak M, Międzybrodzki R, Górski A. The influence of external factors on  
367 bacteriophages—review. *Folia Microbiol (Praha)*. 2011;56: 191–200. doi:10.1007/s12223-  
368 011-0039-8
- 369 23. Faruque SM, Naser IB, Islam MJ, Faruque ASG, Ghosh AN, Nair GB, et al. Seasonal  
370 epidemics of cholera inversely correlate with the prevalence of environmental cholera  
371 phages. *Proc Natl Acad Sci U S A*. 2005;102: 1702–1707. doi:10.1073/pnas.0408992102
- 372 24. LeGault KN, Hays SG, Angermeyer A, McKitterick AC, Johura F, Sultana M, et al. Temporal  
373 shifts in antibiotic resistance elements govern phage-pathogen conflicts. *Science*. 373:  
374 eabg2166. doi:10.1126/science.abg2166

- 375 25. Carey ME, Steele AD. The Severe Typhoid Fever in Africa Program Highlights the Need for  
376 Broad Deployment of Typhoid Conjugate Vaccines. *Clin Infect Dis.* 2019;69: S413–S416.  
377 doi:10.1093/cid/ciz637
- 378 26. Kim CL, Cruz Espinoza LM, Vannice KS, Tadesse BT, Owusu-Dabo E, Rakotozandrindrainy R,  
379 et al. The Burden of Typhoid Fever in Sub-Saharan Africa: A Perspective. *Res Rep Trop*  
380 *Med.* 2022;13: 1–9. doi:10.2147/RRTM.S282461
- 381 27. Wang Y, Moe CL, Dutta S, Wadhwa A, Kanungo S, Mairinger W, et al. Designing a typhoid  
382 environmental surveillance study: A simulation model for optimum sampling site  
383 allocation. *Epidemics.* 2020;31: 100391. doi:10.1016/j.epidem.2020.100391
- 384



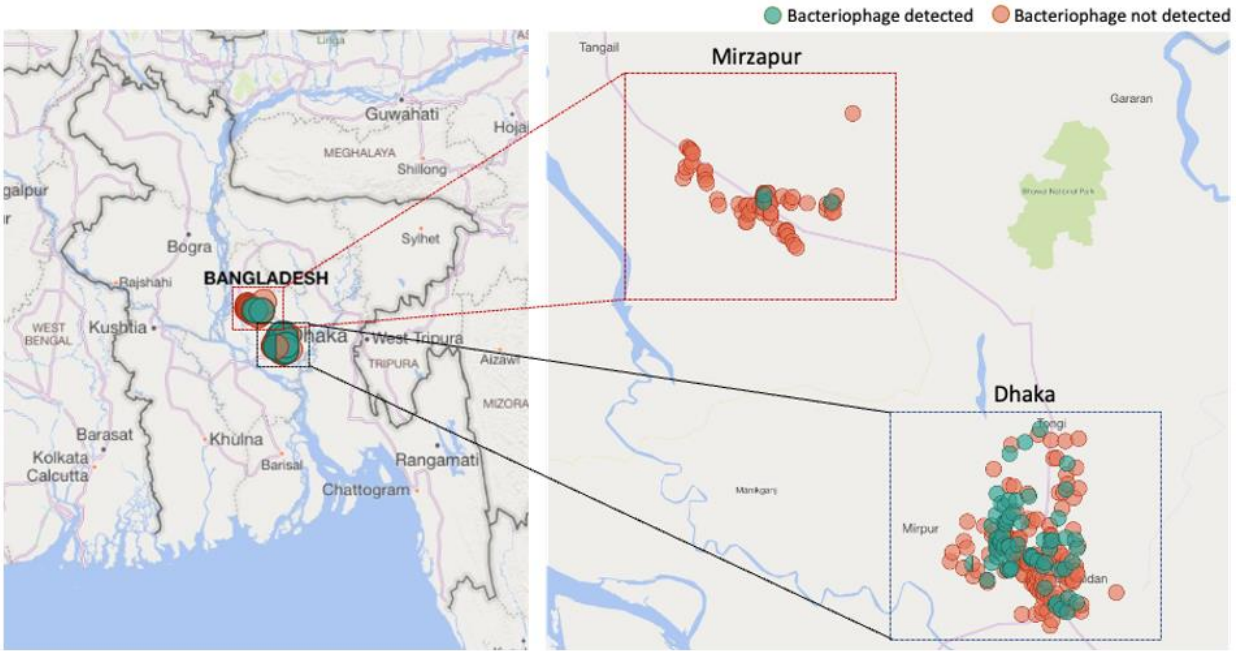

385  
 386  
 387  
 388  
 389  
 390

**Figure 1: Location of water sample collection and detection of Salmonella Typhi phages in water samples.** Water sampling was conducted in two districts in Bangladesh: urban Dhaka and rural Mirzapur, Bangladesh. The water bodies sampled where bacteriophages were detected are shown in green while the water bodies where no bacteriophages are found are shown in red.

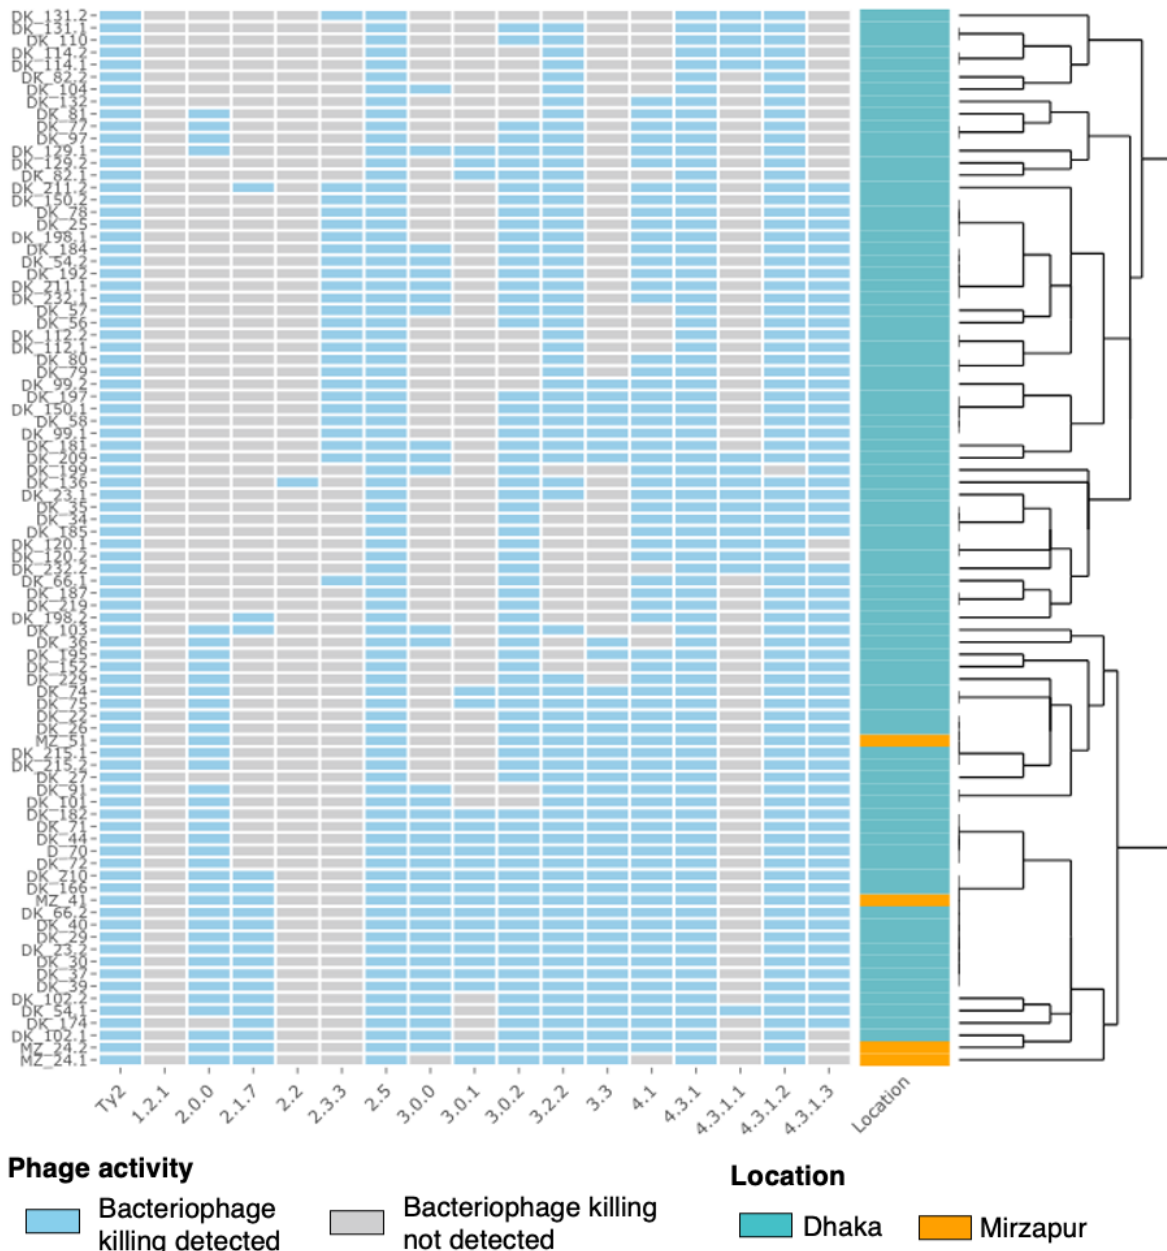

391

392 Figure 2: Hierarchical clustering of the activity spectra of the 86 bacteriophages isolated in the  
 393 study. All isolated phages were spotted on Salmonella Typhi isolates belonging to different  
 394 genotypes (X-axis) circulating in Bangladesh. Blue represents activity/plaque formation, white  
 395 represents no activity/no plaque formation. The phages on the Y-axis are labelled based on the  
 396 site of isolation. Phages from Mirzapur are labelled as MZ, and From Dhaka are labelled as DK.  
 397 Multiple phages isolated from the sample are indicated with .1 and .2 at the end of the label.  
 398 The heat map was made using the R package heatmaply.

399
